# Supplementary material for: Cleavage of histone H2A during embryonic stem cell differentiation destabilizes nucleosomes to counteract gene activation
Source: Research Square preprint supplement (doi:10.21203/rs.3.rs-1397516/v1), 2022-04-27
Supplement: Supplementary file 1 [file 2113615242e5a7c5d5d07184.xlsx]

## Sheet: Sheet1
Ratio To Standard	Normalized Area	Peptide Retention Time	Protein Name	File Name
504.656	33602000	5.16	H009_P0C0S8_histone_h2a_type_1_4_11_unmod	20200815_KD_0__rep1.raw
401.069	48724000	5.26	H009_P0C0S8_histone_h2a_type_1_4_11_unmod	20200815_KD_0__rep2.raw
273.251	42295000	5.27	H009_P0C0S8_histone_h2a_type_1_4_11_unmod	20200815_KD_0__rep3.raw
303.677	28277000	5.18	H009_P0C0S8_histone_h2a_type_1_4_11_unmod	20200815_KD_2__rep1.raw
417.082	63019000	5.26	H009_P0C0S8_histone_h2a_type_1_4_11_unmod	20200815_KD_2__rep2.raw
992.056	105310000	5.25	H009_P0C0S8_histone_h2a_type_1_4_11_unmod	20200815_KD_2_rep3.raw
324.763	32280000	5.17	H009_P0C0S8_histone_h2a_type_1_4_11_unmod	20200815_KD_4__rep1.raw
931.681	98488000	5.26	H009_P0C0S8_histone_h2a_type_1_4_11_unmod	20200815_KD_4__rep2.raw
204.591	18128000	5.27	H009_P0C0S8_histone_h2a_type_1_4_11_unmod	20200815_KD_4__rep3.raw
205.173	44992000	5.15	H009_P0C0S8_histone_h2a_type_1_4_11_unmod	20200815_SCR_0__rep1.raw
78.1754	39926000	5.25	H009_P0C0S8_histone_h2a_type_1_4_11_unmod	20200815_SCR_0__rep2.raw
642.611	89811000	5.24	H009_P0C0S8_histone_h2a_type_1_4_11_unmod	20200815_SCR_0__rep3.raw
497.689	125940000	5.14	H009_P0C0S8_histone_h2a_type_1_4_11_unmod	20200815_SCR_2__rep1.raw
368.876	104530000	5.24	H009_P0C0S8_histone_h2a_type_1_4_11_unmod	20200815_SCR_2__rep2.raw
420.423	75022000	5.25	H009_P0C0S8_histone_h2a_type_1_4_11_unmod	20200815_SCR_2_rep3.raw
288.925	86704000	5.16	H009_P0C0S8_histone_h2a_type_1_4_11_unmod	20200815_SCR_4__rep1.raw
177.824	40819000	5.26	H009_P0C0S8_histone_h2a_type_1_4_11_unmod	20200815_SCR_4__rep2.raw
110.491	22470000	5.27	H009_P0C0S8_histone_h2a_type_1_4_11_unmod	20200815_SCR_4__rep3.raw
37.6739	2515600	4.49	H010_P0C0S8_histone_h2a_type_1_4_11_k5ac	20200815_KD_0__rep1.raw
33.4622	4197000	4.64	H010_P0C0S8_histone_h2a_type_1_4_11_k5ac	20200815_KD_0__rep2.raw
20.1625	2730400	4.64	H010_P0C0S8_histone_h2a_type_1_4_11_k5ac	20200815_KD_0__rep3.raw
59.1283	3874800	4.51	H010_P0C0S8_histone_h2a_type_1_4_11_k5ac	20200815_KD_2__rep1.raw
71.7342	9767200	4.64	H010_P0C0S8_histone_h2a_type_1_4_11_k5ac	20200815_KD_2__rep2.raw
123.036	18709000	4.64	H010_P0C0S8_histone_h2a_type_1_4_11_k5ac	20200815_KD_2_rep3.raw
74.6886	6179400	4.49	H010_P0C0S8_histone_h2a_type_1_4_11_k5ac	20200815_KD_4__rep1.raw
134.22	18318000	4.64	H010_P0C0S8_histone_h2a_type_1_4_11_k5ac	20200815_KD_4__rep2.raw
27.405	2130300	4.65	H010_P0C0S8_histone_h2a_type_1_4_11_k5ac	20200815_KD_4__rep3.raw
25.7992	4062800	4.47	H010_P0C0S8_histone_h2a_type_1_4_11_k5ac	20200815_SCR_0__rep1.raw
7.7448	3175400	4.63	H010_P0C0S8_histone_h2a_type_1_4_11_k5ac	20200815_SCR_0__rep2.raw
77.6704	9751700	4.63	H010_P0C0S8_histone_h2a_type_1_4_11_k5ac	20200815_SCR_0__rep3.raw
144.031	31886000	4.49	H010_P0C0S8_histone_h2a_type_1_4_11_k5ac	20200815_SCR_2__rep1.raw
98.2463	21595000	4.63	H010_P0C0S8_histone_h2a_type_1_4_11_k5ac	20200815_SCR_2__rep2.raw
84.7368	6221100	4.64	H010_P0C0S8_histone_h2a_type_1_4_11_k5ac	20200815_SCR_2_rep3.raw
49.1836	11857000	4.49	H010_P0C0S8_histone_h2a_type_1_4_11_k5ac	20200815_SCR_4__rep1.raw
23.0597	5024800	4.63	H010_P0C0S8_histone_h2a_type_1_4_11_k5ac	20200815_SCR_4__rep2.raw
17.8601	2737700	4.65	H010_P0C0S8_histone_h2a_type_1_4_11_k5ac	20200815_SCR_4__rep3.raw
1.7253	313780	4.51	H011_P0C0S8_histone_h2a_type_1_4_11_k9ac	20200815_KD_0__rep1.raw
0.9941	548280	4.66	H011_P0C0S8_histone_h2a_type_1_4_11_k9ac	20200815_KD_0__rep2.raw
0.8812	381870	4.67	H011_P0C0S8_histone_h2a_type_1_4_11_k9ac	20200815_KD_0__rep3.raw
1.2524	317660	4.53	H011_P0C0S8_histone_h2a_type_1_4_11_k9ac	20200815_KD_2__rep1.raw
2.4303	807240	4.66	H011_P0C0S8_histone_h2a_type_1_4_11_k9ac	20200815_KD_2__rep2.raw
2.3488	1578600	4.67	H011_P0C0S8_histone_h2a_type_1_4_11_k9ac	20200815_KD_2_rep3.raw
1.042	219080	4.52	H011_P0C0S8_histone_h2a_type_1_4_11_k9ac	20200815_KD_4__rep1.raw
1.774	720160	4.66	H011_P0C0S8_histone_h2a_type_1_4_11_k9ac	20200815_KD_4__rep2.raw
0.3177	114870	4.67	H011_P0C0S8_histone_h2a_type_1_4_11_k9ac	20200815_KD_4__rep3.raw
1.5185	508560	4.5	H011_P0C0S8_histone_h2a_type_1_4_11_k9ac	20200815_SCR_0__rep1.raw
0.3665	404420	4.65	H011_P0C0S8_histone_h2a_type_1_4_11_k9ac	20200815_SCR_0__rep2.raw
3.1938	1118800	4.65	H011_P0C0S8_histone_h2a_type_1_4_11_k9ac	20200815_SCR_0__rep3.raw
8.5116	3250100	4.51	H011_P0C0S8_histone_h2a_type_1_4_11_k9ac	20200815_SCR_2__rep1.raw
5.1199	2125500	4.65	H011_P0C0S8_histone_h2a_type_1_4_11_k9ac	20200815_SCR_2__rep2.raw
3.7106	704720	4.66	H011_P0C0S8_histone_h2a_type_1_4_11_k9ac	20200815_SCR_2_rep3.raw
1.3305	776690	4.51	H011_P0C0S8_histone_h2a_type_1_4_11_k9ac	20200815_SCR_4__rep1.raw
0.7206	312980	4.66	H011_P0C0S8_histone_h2a_type_1_4_11_k9ac	20200815_SCR_4__rep2.raw
0.4504	168580	4.67	H011_P0C0S8_histone_h2a_type_1_4_11_k9ac	20200815_SCR_4__rep3.raw
#N/A	17794	5.44	H012_P0C0S8_histone_h2a_type_1_4_11_k5me1	20200815_KD_0__rep1.raw
#N/A	58991	5.54	H012_P0C0S8_histone_h2a_type_1_4_11_k5me1	20200815_KD_0__rep2.raw
#N/A	40205	5.52	H012_P0C0S8_histone_h2a_type_1_4_11_k5me1	20200815_KD_0__rep3.raw
#N/A	26401	5.44	H012_P0C0S8_histone_h2a_type_1_4_11_k5me1	20200815_KD_2__rep1.raw
#N/A	71358	5.5	H012_P0C0S8_histone_h2a_type_1_4_11_k5me1	20200815_KD_2__rep2.raw
#N/A	110150	5.54	H012_P0C0S8_histone_h2a_type_1_4_11_k5me1	20200815_KD_2_rep3.raw
#N/A	7540.2	5.17	H012_P0C0S8_histone_h2a_type_1_4_11_k5me1	20200815_KD_4__rep1.raw
#N/A	46303	4.89	H012_P0C0S8_histone_h2a_type_1_4_11_k5me1	20200815_KD_4__rep2.raw
#N/A	20606	5.52	H012_P0C0S8_histone_h2a_type_1_4_11_k5me1	20200815_KD_4__rep3.raw
#N/A	43125	5.42	H012_P0C0S8_histone_h2a_type_1_4_11_k5me1	20200815_SCR_0__rep1.raw
#N/A	56171	5.51	H012_P0C0S8_histone_h2a_type_1_4_11_k5me1	20200815_SCR_0__rep2.raw
#N/A	96399	6.02	H012_P0C0S8_histone_h2a_type_1_4_11_k5me1	20200815_SCR_0__rep3.raw
#N/A	58410	5.42	H012_P0C0S8_histone_h2a_type_1_4_11_k5me1	20200815_SCR_2__rep1.raw
#N/A	84005	5.51	H012_P0C0S8_histone_h2a_type_1_4_11_k5me1	20200815_SCR_2__rep2.raw
#N/A	50559	5.51	H012_P0C0S8_histone_h2a_type_1_4_11_k5me1	20200815_SCR_2_rep3.raw
#N/A	51161	5.43	H012_P0C0S8_histone_h2a_type_1_4_11_k5me1	20200815_SCR_4__rep1.raw
#N/A	41431	5.52	H012_P0C0S8_histone_h2a_type_1_4_11_k5me1	20200815_SCR_4__rep2.raw
#N/A	18929	5.52	H012_P0C0S8_histone_h2a_type_1_4_11_k5me1	20200815_SCR_4__rep3.raw
#N/A	25766	5.44	H014_P0C0S8_histone_h2a_type_1_4_11_k9me1	20200815_KD_0__rep1.raw
#N/A	70124	5.51	H014_P0C0S8_histone_h2a_type_1_4_11_k9me1	20200815_KD_0__rep2.raw
#N/A	44128	5.52	H014_P0C0S8_histone_h2a_type_1_4_11_k9me1	20200815_KD_0__rep3.raw
#N/A	23883	5.45	H014_P0C0S8_histone_h2a_type_1_4_11_k9me1	20200815_KD_2__rep1.raw
#N/A	67437	4.89	H014_P0C0S8_histone_h2a_type_1_4_11_k9me1	20200815_KD_2__rep2.raw
#N/A	118770	5.54	H014_P0C0S8_histone_h2a_type_1_4_11_k9me1	20200815_KD_2_rep3.raw
#N/A	34411	5.44	H014_P0C0S8_histone_h2a_type_1_4_11_k9me1	20200815_KD_4__rep1.raw
#N/A	82557	4.88	H014_P0C0S8_histone_h2a_type_1_4_11_k9me1	20200815_KD_4__rep2.raw
#N/A	25537	5.52	H014_P0C0S8_histone_h2a_type_1_4_11_k9me1	20200815_KD_4__rep3.raw
#N/A	48900	5.42	H014_P0C0S8_histone_h2a_type_1_4_11_k9me1	20200815_SCR_0__rep1.raw
#N/A	58833	5.51	H014_P0C0S8_histone_h2a_type_1_4_11_k9me1	20200815_SCR_0__rep2.raw
#N/A	132450	5.5	H014_P0C0S8_histone_h2a_type_1_4_11_k9me1	20200815_SCR_0__rep3.raw
#N/A	78712	5.13	H014_P0C0S8_histone_h2a_type_1_4_11_k9me1	20200815_SCR_2__rep1.raw
#N/A	79993	5.51	H014_P0C0S8_histone_h2a_type_1_4_11_k9me1	20200815_SCR_2__rep2.raw
#N/A	55528	5.51	H014_P0C0S8_histone_h2a_type_1_4_11_k9me1	20200815_SCR_2_rep3.raw
#N/A	45380	5.14	H014_P0C0S8_histone_h2a_type_1_4_11_k9me1	20200815_SCR_4__rep1.raw
#N/A	43467	5.51	H014_P0C0S8_histone_h2a_type_1_4_11_k9me1	20200815_SCR_4__rep2.raw
#N/A	25333	5.52	H014_P0C0S8_histone_h2a_type_1_4_11_k9me1	20200815_SCR_4__rep3.raw
0.5361	77791	3.83	H015_P0C0S8_histone_h2a_type_1_4_11_k5ack9ac	20200815_KD_0__rep1.raw
0.2955	117230	4.02	H015_P0C0S8_histone_h2a_type_1_4_11_k5ack9ac	20200815_KD_0__rep2.raw
0.2214	74418	4.03	H015_P0C0S8_histone_h2a_type_1_4_11_k5ack9ac	20200815_KD_0__rep3.raw
0.5058	114480	3.85	H015_P0C0S8_histone_h2a_type_1_4_11_k5ack9ac	20200815_KD_2__rep1.raw
1.2449	322070	4.03	H015_P0C0S8_histone_h2a_type_1_4_11_k5ack9ac	20200815_KD_2__rep2.raw
1.0644	553070	4.03	H015_P0C0S8_histone_h2a_type_1_4_11_k5ack9ac	20200815_KD_2_rep3.raw
0.9391	173670	3.84	H015_P0C0S8_histone_h2a_type_1_4_11_k5ack9ac	20200815_KD_4__rep1.raw
1.6874	461300	4.03	H015_P0C0S8_histone_h2a_type_1_4_11_k5ack9ac	20200815_KD_4__rep2.raw
0.1708	47349	4.04	H015_P0C0S8_histone_h2a_type_1_4_11_k5ack9ac	20200815_KD_4__rep3.raw
0.5111	136480	3.81	H015_P0C0S8_histone_h2a_type_1_4_11_k5ack9ac	20200815_SCR_0__rep1.raw
0.1054	88768	4.02	H015_P0C0S8_histone_h2a_type_1_4_11_k5ack9ac	20200815_SCR_0__rep2.raw
0.7489	275100	4.02	H015_P0C0S8_histone_h2a_type_1_4_11_k5ack9ac	20200815_SCR_0__rep3.raw
4.9604	1389400	3.83	H015_P0C0S8_histone_h2a_type_1_4_11_k5ack9ac	20200815_SCR_2__rep1.raw
2.4568	802780	4.02	H015_P0C0S8_histone_h2a_type_1_4_11_k5ack9ac	20200815_SCR_2__rep2.raw
1.528	211580	4.03	H015_P0C0S8_histone_h2a_type_1_4_11_k5ack9ac	20200815_SCR_2_rep3.raw
0.7741	338860	3.83	H015_P0C0S8_histone_h2a_type_1_4_11_k5ack9ac	20200815_SCR_4__rep1.raw
0.2313	124470	4.02	H015_P0C0S8_histone_h2a_type_1_4_11_k5ack9ac	20200815_SCR_4__rep2.raw
0.2337	81102	4.04	H015_P0C0S8_histone_h2a_type_1_4_11_k5ack9ac	20200815_SCR_4__rep3.raw
#N/A	1533100	5.94	H016_P0C0S8_histone_h2a_type_1_36_42_unmod	20200815_KD_0__rep1.raw
#N/A	3736000	5.99	H016_P0C0S8_histone_h2a_type_1_36_42_unmod	20200815_KD_0__rep2.raw
#N/A	3137800	5.99	H016_P0C0S8_histone_h2a_type_1_36_42_unmod	20200815_KD_0__rep3.raw
#N/A	2387200	5.95	H016_P0C0S8_histone_h2a_type_1_36_42_unmod	20200815_KD_2__rep1.raw
#N/A	5019100	5.99	H016_P0C0S8_histone_h2a_type_1_36_42_unmod	20200815_KD_2__rep2.raw
#N/A	11672000	5.99	H016_P0C0S8_histone_h2a_type_1_36_42_unmod	20200815_KD_2_rep3.raw
#N/A	2723400	5.94	H016_P0C0S8_histone_h2a_type_1_36_42_unmod	20200815_KD_4__rep1.raw
#N/A	6842000	5.99	H016_P0C0S8_histone_h2a_type_1_36_42_unmod	20200815_KD_4__rep2.raw
#N/A	1394500	6	H016_P0C0S8_histone_h2a_type_1_36_42_unmod	20200815_KD_4__rep3.raw
#N/A	2904900	5.92	H016_P0C0S8_histone_h2a_type_1_36_42_unmod	20200815_SCR_0__rep1.raw
#N/A	3715300	5.98	H016_P0C0S8_histone_h2a_type_1_36_42_unmod	20200815_SCR_0__rep2.raw
#N/A	9585400	5.98	H016_P0C0S8_histone_h2a_type_1_36_42_unmod	20200815_SCR_0__rep3.raw
#N/A	13955000	5.92	H016_P0C0S8_histone_h2a_type_1_36_42_unmod	20200815_SCR_2__rep1.raw
#N/A	11945000	5.97	H016_P0C0S8_histone_h2a_type_1_36_42_unmod	20200815_SCR_2__rep2.raw
#N/A	3928400	5.98	H016_P0C0S8_histone_h2a_type_1_36_42_unmod	20200815_SCR_2_rep3.raw
#N/A	6094700	5.93	H016_P0C0S8_histone_h2a_type_1_36_42_unmod	20200815_SCR_4__rep1.raw
#N/A	4511300	5.99	H016_P0C0S8_histone_h2a_type_1_36_42_unmod	20200815_SCR_4__rep2.raw
#N/A	1703000	5.99	H016_P0C0S8_histone_h2a_type_1_36_42_unmod	20200815_SCR_4__rep3.raw
#N/A	14587000	8.54	H017_P0C0S8_histone_h2a_type_1_82_88_unmod	20200815_KD_0__rep1.raw
#N/A	111850000	8.54	H017_P0C0S8_histone_h2a_type_1_82_88_unmod	20200815_KD_0__rep2.raw
#N/A	42687000	8.55	H017_P0C0S8_histone_h2a_type_1_82_88_unmod	20200815_KD_0__rep3.raw
#N/A	45403000	8.55	H017_P0C0S8_histone_h2a_type_1_82_88_unmod	20200815_KD_2__rep1.raw
#N/A	190540000	8.54	H017_P0C0S8_histone_h2a_type_1_82_88_unmod	20200815_KD_2__rep2.raw
#N/A	457670000	8.52	H017_P0C0S8_histone_h2a_type_1_82_88_unmod	20200815_KD_2_rep3.raw
#N/A	58414000	8.55	H017_P0C0S8_histone_h2a_type_1_82_88_unmod	20200815_KD_4__rep1.raw
#N/A	181190000	8.54	H017_P0C0S8_histone_h2a_type_1_82_88_unmod	20200815_KD_4__rep2.raw
#N/A	42874000	8.56	H017_P0C0S8_histone_h2a_type_1_82_88_unmod	20200815_KD_4__rep3.raw
#N/A	94624000	8.51	H017_P0C0S8_histone_h2a_type_1_82_88_unmod	20200815_SCR_0__rep1.raw
#N/A	163320000	8.52	H017_P0C0S8_histone_h2a_type_1_82_88_unmod	20200815_SCR_0__rep2.raw
#N/A	443310000	8.5	H017_P0C0S8_histone_h2a_type_1_82_88_unmod	20200815_SCR_0__rep3.raw
#N/A	556480000	8.47	H017_P0C0S8_histone_h2a_type_1_82_88_unmod	20200815_SCR_2__rep1.raw
#N/A	378580000	8.51	H017_P0C0S8_histone_h2a_type_1_82_88_unmod	20200815_SCR_2__rep2.raw
#N/A	26169000	8.54	H017_P0C0S8_histone_h2a_type_1_82_88_unmod	20200815_SCR_2_rep3.raw
#N/A	232540000	8.52	H017_P0C0S8_histone_h2a_type_1_82_88_unmod	20200815_SCR_4__rep1.raw
#N/A	71473000	8.54	H017_P0C0S8_histone_h2a_type_1_82_88_unmod	20200815_SCR_4__rep2.raw
#N/A	46046000	8.55	H017_P0C0S8_histone_h2a_type_1_82_88_unmod	20200815_SCR_4__rep3.raw
