# Supplementary material for: Cleavage of histone H2A during embryonic stem cell differentiation destabilizes nucleosomes to counteract gene activation
Source: Research Square preprint supplement (doi:10.21203/rs.3.rs-1397516/v1), 2022-04-27
Supplement: Supplementary file 3 [file cc1199f21db15f4526aa93b8.xlsx]

## Sheet: Day 0
peptide	PeptideSequence	sh_SC-rep1	sh_SC-rep2	sh_SC-rep3	average	sd		peptide	PeptideSequence	sh-CTSL_rep1	sh-CTSL_rep2	sh-CTSL_rep3	average	sd
A21	SGRGKQGGKARAKAKTRSSRA	0.00651586	0.0340823	0.000392762	0.0136637	0.0179462		R20	SGRGKQGGKARAKAKTRSSR	0.0059972	0.00219452	1.56217e-06	0.00273109	0.00303362
G22	SGRGKQGGKARAKAKTRSSRAG	1.92987e-05	0.000131858	0.000204672	0.00011861	9.33941e-05		A21	SGRGKQGGKARAKAKTRSSRA	0.039499	0.00109292	0.0123959	0.0176626	0.0197373
L23	SGRGKQGGKARAKAKTRSSRAGL		0.000982775	0.000529216	0.000755996	0.000320714		G22	SGRGKQGGKARAKAKTRSSRAG	0.00603051	0.00174198	0.0029017	0.00355806	0.00221832
F25	SGRGKQGGKARAKAKTRSSRAGLQF	6.75754e-05	0.00067911	6.89801e-05	0.000271889	0.000352665		L23	SGRGKQGGKARAKAKTRSSRAGL	0.00362916	0.00224503	0.000707608	0.00219393	0.00146144
P26	SGRGKQGGKARAKAKTRSSRAGLQFP		2.52391e-05	0.00015696	9.10998e-05	9.31411e-05		Q24	SGRGKQGGKARAKAKTRSSRAGLQ	7.04454e-05		0.000783195	0.00042682	0.00050399
G28	SGRGKQGGKARAKAKTRSSRAGLQFPVG	0.00145591	0.00113429	0.00602434	0.00287151	0.00273516		F25	SGRGKQGGKARAKAKTRSSRAGLQF	0.0106082	0.000221672	0.00226892	0.00436626	0.00550174
R29	SGRGKQGGKARAKAKTRSSRAGLQFPVGR	0.000118732	2.54334e-05	1.42685e-05	5.28112e-05	5.73611e-05		P26	SGRGKQGGKARAKAKTRSSRAGLQFP	0.000120645		6.60106e-06	6.36228e-05	8.06409e-05
G37	SGRGKQGGKARAKAKTRSSRAGLQFPVGRVHRLLRKG	5.64933e-05	0.000434526		0.00024551	0.00026731		V27	SGRGKQGGKARAKAKTRSSRAGLQFPV	0.000106115	0.000136352	7.14228e-05	0.00010463	3.249e-05
N38	SGRGKQGGKARAKAKTRSSRAGLQFPVGRVHRLLRKGN	2.53299e-05	9.80197e-05	5.20343e-05	5.84613e-05	3.67686e-05		G28	SGRGKQGGKARAKAKTRSSRAGLQFPVG	0.00205225	0.00113269	2.55596e-06	0.0010625	0.00102665
R20	SGRGKQGGKARAKAKTRSSR	0.000285353	0.000817596		0.000551474	0.000376352		R29	SGRGKQGGKARAKAKTRSSRAGLQFPVGR	0.000116226	0.00271048	1.03864e-05	0.000945698	0.00152926
K36	SGRGKQGGKARAKAKTRSSRAGLQFPVGRVHRLLRK	0.000193857	0.000494183	1.65841e-05	0.000234875	0.000241427		R32	SGRGKQGGKARAKAKTRSSRAGLQFPVGRVHR	1.92587e-05	0.000613478		0.000316369	0.000420177
V43	SGRGKQGGKARAKAKTRSSRAGLQFPVGRVHRLLRKGNYAERV	0.000191773	0.00105219	0.000117273	0.000453746	0.000519606		L34	SGRGKQGGKARAKAKTRSSRAGLQFPVGRVHRLL		1.32882e-05	7.42868e-06	1.03584e-05	4.14328e-06
V27	SGRGKQGGKARAKAKTRSSRAGLQFPV	6.96381e-05		7.94601e-05	7.45491e-05	6.94523e-06		G37	SGRGKQGGKARAKAKTRSSRAGLQFPVGRVHRLLRKG	6.18997e-06	2.15695e-06	2.18683e-06	3.51125e-06	2.31989e-06
V30	SGRGKQGGKARAKAKTRSSRAGLQFPVGRV	1.9962e-05		1.12751e-05	1.56186e-05	6.14256e-06		Y39	SGRGKQGGKARAKAKTRSSRAGLQFPVGRVHRLLRKGNY	0.000115472	4.55801e-05	2.09717e-06	5.4383e-05	5.71976e-05
Y39	SGRGKQGGKARAKAKTRSSRAGLQFPVGRVHRLLRKGNY	5.48927e-05		4.63709e-05	5.06318e-05	6.02576e-06		R42	SGRGKQGGKARAKAKTRSSRAGLQFPVGRVHRLLRKGNYAER	0.000825798		7.40641e-06	0.000416602	0.00057869
								V43	SGRGKQGGKARAKAKTRSSRAGLQFPVGRVHRLLRKGNYAERV	0.00049679		7.81349e-06	0.000252302	0.000345758
								V49	SGRGKQGGKARAKAKTRSSRAGLQFPVGRVHRLLRKGNYAERVGAGAPV		8.69699e-06	6.04303e-06	7.37001e-06	1.87663e-06
									49

## Sheet: Sheet1
peptide	S19	R20	A21	G22	L23	Q24	F25	P26	V27	G28	R29	V30	H31	R32	L33	L34	R35	K36	G37	N38	Y39	R42	V43	G44	V49	A60	I62
Day 0 sh_SC-rep1		0.000285353	0.00651586	1.92987e-05			6.75754e-05		6.96381e-05	0.00145591	0.000118732	1.9962e-05						0.000193857	5.64933e-05	2.53299e-05	5.48927e-05		0.000191773
Day 0 sh_SC-rep2		0.000817596	0.0340823	0.000131858	0.000982775		0.00067911	2.52391e-05		0.00113429	2.54334e-05							0.000494183	0.000434526	9.80197e-05			0.00105219
Day 0 sh_SC-rep3			0.000392762	0.000204672	0.000529216		6.89801e-05	0.00015696	7.94601e-05	0.00602434	1.42685e-05	1.12751e-05						1.65841e-05		5.20343e-05	4.63709e-05		0.000117273
Day 0 sh-CTSL_rep1		0.0059972	0.039499	0.00603051	0.00362916	7.04454e-05	0.0106082	0.000120645	0.000106115	0.00205225	0.000116226			1.92587e-05		1.32882e-05			6.18997e-06		0.000115472	0.000825798	0.00049679
Day 0 sh-CTSL_rep2		0.00219452	0.00109292	0.00174198	0.00224503		0.000221672		0.000136352	0.00113269	0.00271048			0.000613478		7.42868e-06			2.15695e-06		4.55801e-05				8.69699e-06
Day 0 sh-CTSL_rep3		1.56217e-06	0.0123959	0.0029017	0.000707608	0.000783195	0.00226892	6.60106e-06	7.14228e-05	2.55596e-06	1.03864e-05								2.18683e-06		2.09717e-06	7.40641e-06	7.81349e-06		6.04303e-06
Day 2 sh_SC-rep1		0.000181586	0.00756624	0.00331066	0.00024047	0.000435276	0.00200916	0.00113633	0.000204842	0.000393783	0.00138053
Day 2 sh_SC-rep2	0.000247807	0.000279152	0.00239258	0.00232133	0.00453859	0.000970289	0.00289301	0.000675221	0.000250931	0.00731704	0.000955578		0.000723084	2.89673e-05					0.00640775	0.0019039				0.000118644
Day 2 sh_SC-rep3	8.66562e-06	0.00149113	0.00206686	1.54332e-05	0.000209916	0.000765589	0.00748287	0.000229064	0.00213332	0.00368072	0.000540661		0.00118179	0.000582958					0.00421629	0.000346141				0.000686534
Day 2 sh-CTSL_rep1		0.000619048	0.000804513	0.000500989	0.00376802	5.07373e-05	0.00158682	0.000280482	5.96087e-05	0.000617124	0.00038834							0.000150626	0.000552988	0.000238814	1.10126e-05	0.000190521	0.000837735
Day 2 sh-CTSL_rep2			0.00612495	0.000221904	0.000587463	2.15395e-05	0.000209837	0.000116441	0.0175811	1.1018e-05			5.47667e-06		0.00011456							2.48483e-05	0.00767503
Day 2 sh-CTSL_rep3		0.000644736	0.00305775	0.00253999	0.0032583	0.000592912	0.00528526	0.000182329	0.000152176	0.00566065	0.000279608		0.000240705		3.00228e-06			0.000336083	0.00121996	0.00291889	0.000509863	0.00124681	0.000465494
Day 4 sh_SC-rep1		0.000451918	0.00397273		0.0088862	0.000661213	0.00289177	0.00110513	0.00155511	0.00169694	0.00275984	3.92291e-05	0.000932971					0.000212552	0.000361589	0.000150217	0.000449319		0.000337342
Day 4 sh_SC-rep2		5.01895e-05	0.00116143	0.000100655	0.00958673	0.000222672	0.000924363	0.000909267	0.00138602	0.000728355	0.000230932	0.00320171						0.000121201	0.000411246	0.000374566	0.00022837		1.41627e-05
Day 4 sh_SC-rep3		0.000551992	0.00123626	0.0027867	0.00302131	0.000771005	0.00318114	0.000281001	0.00240136	0.00690353	0.00017546		0.000678361					0.00317141	0.00557195	0.00135582	0.000293967		0.00332146
Day 4 sh-CTSL_rep1		0.000362418	0.00156291	0.000258205	0.00373374	0.00058592	0.00160212	0.000180271	1.67866e-05	0.000284121	0.000419995	4.41969e-05		0.000720393	1.34102e-05		0.00312392		0.000197092	0.000172149	0.000479216					0.000215462
Day 4 sh-CTSL_rep2		3.86971e-05	0.000374121	0.000317488	0.000713744	9.41967e-05	0.000419643	8.38209e-05	8.59279e-05	0.00108815	0.00012926	1.10139e-05			3.16687e-05		0.000120955	0.000181913	0.000756083	0.000216519	5.06358e-05					0.000115578	1.06459e-05
Day 4 sh-CTSL_rep3		3.65984e-05	0.00229439	2.12962e-05	0.00548734	0.00219364	0.00499349	0.000611409	0.000941465	0.000339758	0.000722731	0.000821006		0.00112185			0.000692682	2.69826e-05	0.000397796	0.000151463	0.000528913						0.000450816

## Sheet: Day 2
peptide	PeptideSequence	sh_SC-rep1	sh_SC-rep2	sh_SC-rep3	average	sd			peptide	PeptideSequence	sh-CTSL_rep1	sh-CTSL_rep2	sh-CTSL_rep3	average	sd
S19	SGRGKQGGKARAKAKTRSS		0.000247807	8.66562e-06	0.000128236	0.000169099	19		R20	SGRGKQGGKARAKAKTRSSR	0.000619048		0.000644736	0.000631892	1.8164e-05
R20	SGRGKQGGKARAKAKTRSSR	0.000181586	0.000279152	0.00149113	0.000650624	0.000729536	20		A21	SGRGKQGGKARAKAKTRSSRA	0.000804513	0.00612495	0.00305775	0.00332907	0.00267058
A21	SGRGKQGGKARAKAKTRSSRA	0.00756624	0.00239258	0.00206686	0.00400856	0.00308534	21		G22	SGRGKQGGKARAKAKTRSSRAG	0.000500989	0.000221904	0.00253999	0.00108763	0.0012655
G22	SGRGKQGGKARAKAKTRSSRAG	0.00331066	0.00232133	1.54332e-05	0.00188247	0.00169088	22		L23	SGRGKQGGKARAKAKTRSSRAGL	0.00376802	0.000587463	0.0032583	0.00253793	0.00170827
L23	SGRGKQGGKARAKAKTRSSRAGL	0.00024047	0.00453859	0.000209916	0.00166299	0.00249039	23		Q24	SGRGKQGGKARAKAKTRSSRAGLQ	5.07373e-05	2.15395e-05	0.000592912	0.00022173	0.000321785
Q24	SGRGKQGGKARAKAKTRSSRAGLQ	0.000435276	0.000970289	0.000765589	0.000723718	0.000269953	24		F25	SGRGKQGGKARAKAKTRSSRAGLQF	0.00158682	0.000209837	0.00528526	0.00236064	0.00262471
F25	SGRGKQGGKARAKAKTRSSRAGLQF	0.00200916	0.00289301	0.00748287	0.00412834	0.00293852	25		P26	SGRGKQGGKARAKAKTRSSRAGLQFP	0.000280482	0.000116441	0.000182329	0.000193084	8.25476e-05
P26	SGRGKQGGKARAKAKTRSSRAGLQFP	0.00113633	0.000675221	0.000229064	0.000680204	0.000453651	26		V27	SGRGKQGGKARAKAKTRSSRAGLQFPV	5.96087e-05	0.0175811	0.000152176	0.00593097	0.0100894
V27	SGRGKQGGKARAKAKTRSSRAGLQFPV	0.000204842	0.000250931	0.00213332	0.000863032	0.00110035	27		G28	SGRGKQGGKARAKAKTRSSRAGLQFPVG	0.000617124	1.1018e-05	0.00566065	0.00209626	0.00310169
G28	SGRGKQGGKARAKAKTRSSRAGLQFPVG	0.000393783	0.00731704	0.00368072	0.00379718	0.0034631	28		R29	SGRGKQGGKARAKAKTRSSRAGLQFPVGR	0.00038834		0.000279608	0.000333974	7.68854e-05
R29	SGRGKQGGKARAKAKTRSSRAGLQFPVGR	0.00138053	0.000955578	0.000540661	0.000958923	0.000419945	29		H31	SGRGKQGGKARAKAKTRSSRAGLQFPVGRVH		5.47667e-06	0.000240705	0.000123091	0.000166332
H31	SGRGKQGGKARAKAKTRSSRAGLQFPVGRVH		0.000723084	0.00118179	0.000952436	0.000324352	31		L33	SGRGKQGGKARAKAKTRSSRAGLQFPVGRVHRL	0.00011456	3.00228e-06		5.87809e-05	7.88829e-05
R32	SGRGKQGGKARAKAKTRSSRAGLQFPVGRVHR		2.89673e-05	0.000582958	0.000305963	0.000391731	32		L34	SGRGKQGGKARAKAKTRSSRAGLQFPVGRVHRLL	0.000150626		0.000336083	0.000243354	0.000131138
G37	SGRGKQGGKARAKAKTRSSRAGLQFPVGRVHRLLRKG		0.00640775	0.00421629	0.00531202	0.0015496	37		K36	SGRGKQGGKARAKAKTRSSRAGLQFPVGRVHRLLRK	0.000552988		0.00121996	0.000886474	0.00047162
N38	SGRGKQGGKARAKAKTRSSRAGLQFPVGRVHRLLRKGN		0.0019039	0.000346141	0.00112502	0.0011015	38		G37	SGRGKQGGKARAKAKTRSSRAGLQFPVGRVHRLLRKG	0.000238814		0.00291889	0.00157885	0.0018951
G44	SGRGKQGGKARAKAKTRSSRAGLQFPVGRVHRLLRKGNYAERVG		0.000118644	0.000686534	0.000402589	0.000401558	44		N38	SGRGKQGGKARAKAKTRSSRAGLQFPVGRVHRLLRKGN	1.10126e-05		0.000509863	0.000260438	0.00035274
							0		Y38	SGRGKQGGKARAKAKTRSSRAGLQFPVGRVHRLLRKGNY	0.000190521	2.48483e-05	0.00124681	0.000487394	0.000662871
							0		V43	SGRGKQGGKARAKAKTRSSRAGLQFPVGRVHRLLRKGNYAERV	0.000837735	0.00767503	0.000465494	0.00299275	0.00405924

## Sheet: Day 4
peptide	sequence	sh_SC-rep1	sh_SC-rep2	sh_SC-rep3	average	sd			peptide	peptide	sh-CTSL_rep1	sh-CTSL_rep2	sh-CTSL_rep3	average	sd
R20	SGRGKQGGKARAKAKTRSSR	0.000451918	5.01895e-05	0.000551992	0.000351366	0.000265583	20		R20	SGRGKQGGKARAKAKTRSSR	0.000362418	3.86971e-05	3.65984e-05	0.000145904	0.000187509	20
A21	SGRGKQGGKARAKAKTRSSRA	0.00397273	0.00116143	0.00123626	0.00212347	0.00160194	21		A21	SGRGKQGGKARAKAKTRSSRA	0.00156291	0.000374121	0.00229439	0.00141047	0.000969169	21
K36	SGRGKQGGKARAKAKTRSSRAG		0.000100655	0.0027867	0.00144368	0.00189932	22		G22	SGRGKQGGKARAKAKTRSSRAG	0.000258205	0.000317488	2.12962e-05	0.000198996	0.000156722	22
L23	SGRGKQGGKARAKAKTRSSRAGL	0.0088862	0.00958673	0.00302131	0.00716475	0.00360538	23		L23	SGRGKQGGKARAKAKTRSSRAGL	0.00373374	0.000713744	0.00548734	0.00331161	0.00241463	23
Y39	SGRGKQGGKARAKAKTRSSRAGLQ	0.000661213	0.000222672	0.000771005	0.00055163	0.000290127	24		Q24	SGRGKQGGKARAKAKTRSSRAGLQ	0.00058592	9.41967e-05	0.00219364	0.000957918	0.00109804	24
V43	SGRGKQGGKARAKAKTRSSRAGLQF	0.00289177	0.000924363	0.00318114	0.00233242	0.00122797	25		F25	SGRGKQGGKARAKAKTRSSRAGLQF	0.00160212	0.000419643	0.00499349	0.00233842	0.00237416	25
P26	SGRGKQGGKARAKAKTRSSRAGLQFP	0.00110513	0.000909267	0.000281001	0.000765133	0.000430557	26		P26	SGRGKQGGKARAKAKTRSSRAGLQFP	0.000180271	8.38209e-05	0.000611409	0.000291834	0.00028093	26
V27	SGRGKQGGKARAKAKTRSSRAGLQFPV	0.00155511	0.00138602	0.00240136	0.00178083	0.000544001	27		V27	SGRGKQGGKARAKAKTRSSRAGLQFPV	1.67866e-05	8.59279e-05	0.000941465	0.00034806	0.000515065	27
G28	SGRGKQGGKARAKAKTRSSRAGLQFPVG	0.00169694	0.000728355	0.00690353	0.00310961	0.00332113	28		G28	SGRGKQGGKARAKAKTRSSRAGLQFPVG	0.000284121	0.00108815	0.000339758	0.000570677	0.000449009	28
R29	SGRGKQGGKARAKAKTRSSRAGLQFPVGR	0.00275984	0.000230932	0.00017546	0.00105541	0.00147634	29		R29	SGRGKQGGKARAKAKTRSSRAGLQFPVGR	0.000419995	0.00012926	0.000722731	0.000423995	0.000296756	29
V30	SGRGKQGGKARAKAKTRSSRAGLQFPVGRV	3.92291e-05	0.00320171		0.00162047	0.00223621	30		V30	SGRGKQGGKARAKAKTRSSRAGLQFPVGRV	4.41969e-05	1.10139e-05	0.000821006	0.000292072	0.00045837	30
H31	SGRGKQGGKARAKAKTRSSRAGLQFPVGRVH	0.000932971		0.000678361	0.000805666	0.000180036	31		R32	SGRGKQGGKARAKAKTRSSRAGLQFPVGRVHR	0.000720393		0.00112185	0.00092112	0.00028387	32
K36	SGRGKQGGKARAKAKTRSSRAGLQFPVGRVHRLLRK	0.000212552	0.000121201	0.00317141	0.00116839	0.00173527	36		L33	SGRGKQGGKARAKAKTRSSRAGLQFPVGRVHRL	1.34102e-05	3.16687e-05		2.25394e-05	1.29107e-05	33
G37	SGRGKQGGKARAKAKTRSSRAGLQFPVGRVHRLLRKG	0.000361589	0.000411246	0.00557195	0.00211493	0.00299397	37		R35	SGRGKQGGKARAKAKTRSSRAGLQFPVGRVHRLLR	0.00312392	0.000120955	0.000692682	0.00131252	0.00159455	35
N38	SGRGKQGGKARAKAKTRSSRAGLQFPVGRVHRLLRKGN	0.000150217	0.000374566	0.00135582	0.000626869	0.000641182	38		K36	SGRGKQGGKARAKAKTRSSRAGLQFPVGRVHRLLRK		0.000181913	2.69826e-05	0.000104448	0.000109552	36
Y39	SGRGKQGGKARAKAKTRSSRAGLQFPVGRVHRLLRKGNY	0.000449319	0.00022837	0.000293967	0.000323885	0.000113472	39		G37	SGRGKQGGKARAKAKTRSSRAGLQFPVGRVHRLLRKG	0.000197092	0.000756083	0.000397796	0.000450324	0.000283173	37
V43	SGRGKQGGKARAKAKTRSSRAGLQFPVGRVHRLLRKGNYAERV	0.000337342	1.41627e-05	0.00332146	0.00122432	0.00182335	43		N38	SGRGKQGGKARAKAKTRSSRAGLQFPVGRVHRLLRKGN	0.000172149	0.000216519	0.000151463	0.000180043	3.32389e-05	38
							0		Y39	SGRGKQGGKARAKAKTRSSRAGLQFPVGRVHRLLRKGNY	0.000479216	5.06358e-05	0.000528913	0.000352922	0.000262964	39
							0		A60	SGRGKQGGKARAKAKTRSSRAGLQFPVGRVHRLLRKGNYAERVGAGAPVYLAAVLEYLTA	0.000215462	0.000115578		0.00016552	7.06292e-05	60
	22						2		I62	SGRGKQGGKARAKAKTRSSRAGLQFPVGRVHRLLRKGNYAERVGAGAPVYLAAVLEYLTAEI		1.06459e-05	0.000450816	0.000230731	0.000311247	62
